# Supplementary material for: Impact of Endometrial Preparation on the Maternal and Fetal Cardiovascular Variables of the First Trimester Combined Screening Test
Source: MDPI journal article supplement (doi:10.3390/jcm12216854), 2023-10-30
Supplement: s1 [file s1]

**Table S1.** Baseline characteristics of the two study groups (only homologous).

| Characteristics                 | Natural Cycle<br>n = 168 | HRT Cycle<br>n = 97 | p       |
|---------------------------------|--------------------------|---------------------|---------|
| Age (years)                     | 36 [33–39]               | 36 [33–39]          | 0.84    |
| BMI (kg/m <sup>2</sup> )        | 21.3 [19.6–23.4]         | 20.8 [19.4–23.5]    | 0.46    |
| Smoking                         | 28 (17%)                 | 13 (13%)            | 0.60    |
| Previous deliveries             | 34 (20%)                 | 14 (14%)            | 0.25    |
| Previous pregnancy              | 63 (38%)                 | 36 (37%)            | 1.00    |
| Duration of infertility (years) | 3 [2–4]                  | 3 [2–4]             | 0.37    |
| Previous gynecology surgery     | 40 (24%)                 | 23 (24%)            | 1.00    |
| Regular cycles                  | 158 (94%)                | 69 (71%)            | < 0.001 |
| Indication to IVF               |                          |                     | 0.008   |
| Unexplained                     | 53 (32%)                 | 31 (32%)            |         |
| Endometriosis                   | 20 (12%)                 | 5 (5%)              |         |
| Tubal factor                    | 16 (9%)                  | 6 (6%)              |         |
| Disovulatory                    | 4 (2%)                   | 14 (15%)            |         |
| Male factor                     | 52 (31%)                 | 28 (29%)            |         |
| Genetic                         | 13 (8%)                  | 6 (6%)              |         |
| Mixed                           | 10 (6%)                  | 7 (7%)              |         |

Data are presented as median (interquartile range—IQR) or number (%).

**Table S2.** Maternal and fetal parameters in first trimester combined screening test (only homologous)

| Characteristics                             | Natural Cycle<br>n = 168 | HRT Cycle<br>n = 97 | p       |
|---------------------------------------------|--------------------------|---------------------|---------|
| $\beta$ -hCG (MoM)                          | 1.13 [0.73–1.55]         | 1.09 [0.75–1.74]    | 0.76    |
| PAPP_A (MoM)                                | 1.21 [0.69–1.71]         | 1.17 [0.79–1.93]    | 0.35    |
| NT                                          | 1.8 [1.6–2.0]            | 1.8 [1.6–2.0]       | 0.78    |
| FHR                                         | 160 [155–164]            | 164 [157–167]       | 0.008   |
| UtA-PI (MoM)                                | 0.94 [0.76–1.19]         | 0.74 [0.58 – 0.94]  | < 0.001 |
| MAP (MoM)                                   | 1.019 [0.964–1.082]      | 1.040 [0.980–1.109] | 0.035   |
| PIGF (MoM)                                  | 1.04 [0.80–1.19]         | 1.03 [0.69–1.37]    | 0.80    |
| High risk for trisomy 21 ( $\leq 1$ su 250) | 13 (8%)                  | 10 (10%)            | 0.50    |
| High risk for trisomy 18 ( $\leq 1$ su 250) | 2 (1%)                   | 2 (2%)              | 0.63    |
| High risk for trisomy 13 ( $\leq 1$ su 250) | 1 (1%)                   | 2 (2%)              | 0.56    |
| High risk combined test                     | 15 (9%)                  | 11 (11%)            | 0.53    |
| High risk for preeclampsia <sup>a</sup>     | 59 (38%)                 | 26 (29%)            | 0.17    |

Data are presented as median (interquartile range—IQR) or number (%).

<sup>a</sup>Data available for 154 patients in natural cycle group and 89 in HRT group.
